# Supplementary material
Source: PubMed Central journal article supplement (PMC3816096)
Supplement: NIHMS378332-supplement-Supplementary_Table.pdf [file NIHMS378332-supplement-Supplementary_Table.pdf]

| <b>TABLE SI</b>               | <b>Primers used to construct <i>virB10</i> mutations</b> |
|-------------------------------|----------------------------------------------------------|
| <b>Ala-Cys<br/>Insertions</b> | 5' - 3' primer                                           |
| 05                            | 5'-CATGTGCCGCTTGCT <b>GCATGC</b> ACTATCGTTATTC-3'        |
| 10                            | 5'-GATGCATCAACCT <b>GCATGC</b> ATGTGCCGCTTG-3'           |
| 15                            | 5'-CGGAGACCAGGGATCC <b>GCATGC</b> AGATGCATCAA-3'         |
| 20                            | 5'-CGGCGATGTTTGT <b>GCATGC</b> GGAGACCAGGGATC-3'         |
| 25                            | 5'-GACCCCGAAAGACG <b>GCATGC</b> CCGGCGATGTTTG-3'         |
| 30                            | 5'-GATCAATTTCT <b>GCATGC</b> AGACCCCGAAAG-3'             |
| 35                            | 5'-CGAGAACGACACCTCC <b>GCATGC</b> GACGATCAATTTTC-3'      |
| 40                            | 5'-CTTAACGATAACGC <b>GCATGC</b> GAGAACGACACC-3'          |
| 45                            | 5'-CCTAGCCAAATGAG <b>GCATGC</b> GCTTAACGATAAC-3'         |
| 50                            | 5'-CTTTTGACGCCC <b>GCATGC</b> ACCTAGCCAAAT-3'            |
| <b>Cys<br/>Substitutions</b>  |                                                          |
| S61C                          | 5'-AGTTGACGG <b>GCATGC</b> GTTGTC-3'                     |
| N69C                          | 5'-GAAATGGCTTAGT <b>GCATGC</b> TGCGAT-3'                 |
| P77C                          | 5'-GCACCTCAAT <b>GCATGC</b> TGGAT-3'                     |
| V87C                          | 5'-GAACAGCCTCTT <b>GCATGC</b> TGGAGT-3'                  |
| P99C                          | 5'-CGGCTCGCCCCT <b>GCAG</b> GGTTGAGGAAC-3'               |
| Y118C                         | 5'-CGCCACTGCT <b>GCATGC</b> AAAAATC-3'                   |
| S130C                         | 5'-GCCCATGTGCCCCT <b>GCATGC</b> GCGCTTG-3'               |
| T173C                         | 5'-GTGCGGCAAGAG <b>GCATGC</b> CCCTGCTG-3'                |
| N218C                         | 5'-CAAGAAGCAG <b>GCATGC</b> AGTTCGTTGTTC-3'              |
| G230C                         | 5'-ACCGTTGTTT <b>GC</b> GAAATACAGCGTG-3'                 |
| V243C                         | 5'-AGGGAGATGAG <b>GCATGC</b> TTTGTGTTGTGG-3'             |
| D278C                         | 5'-GGCTCGGT <b>CTGCAG</b> CCACTTCTGG-3'                  |
| Q295C                         | 5'-TTGAGTGCTGTTT <b>GC</b> GGCGCCTTCCAGGCA-3'            |
| G306C                         | 5'-AGCACCTAC <b>GCATGC</b> AGCTCGGGTGGC-3'               |

| TABLE SI                  | Continued                                                                                                                                  |
|---------------------------|--------------------------------------------------------------------------------------------------------------------------------------------|
| C190S                     | 5'-ACAATAATTCCGAGCATCCTGCAAACCG-3'                                                                                                         |
| C206S                     | 5'-AGGCTATGTAAAGAGTGTCTTGCCTCATTAT-3'                                                                                                      |
| RDLDf-<br>RKLDf           | 5'-TTCGTGGCACGGAAGCTCGATTTCTTTGGTG-3'<br>5'-CACCAAAGAAATCGAGCTTCCGTGCCACGAAA-3'                                                            |
| RDLDf-<br>RDLCf           | 5'-CTGGCACGGGACCTCT <b>TGCT</b> TCTTTGGTGTTTACCA-3'<br>5'-GTA AACACCAAAGAAGCAGAGGTCCCG-3'                                                  |
| RDLDf-<br>QNALM           | 5'-TTTCCATTTTCGTGGCACAGAACGCCCTTATGTTTGGTGTTTACCAG-3'<br>5'-GTA AACACCAAACATAAGGGCGTTCGTGCCACGAAAATGG-3'                                   |
| <b>Deletions</b>          |                                                                                                                                            |
| $\Delta$ N18              | 5'-CGAGCTAAGGAGATAACATATGGTCTCCGACAAACATCGCCGGCGTC-3'<br>5'-GACGCCGGCGATGTTTGTGGAGACCATATGTTATCTCCTTAGCTCG-3'                              |
| $\Delta$ N46              | 5'-CTGGTCTCCGASAAACATCGCCGGCGTCATATGATTTGGCTAGGTGGGCGTCAAAGAAG -3'<br>5'-GTCATTCACCTTCTTTTGACGCCACCTAGCCAAATCATATGACGGCGGCGATGTTTGTGGGA-3' |
| $\Delta$ 181-377          | 5'-CCCGATTTTTAAAGTAACGCAAGGGAC-3'<br>5'-TTGCGTTACTTAAAAATCGGGGTG-3'                                                                        |
| $\Delta$ 72-92            | 5'-GATCGCAGCAAACACTAGCCTACTGTTCTCAACCGCCAAGGG-3'<br>5'-CCCTTGGCGGTTGAGGAACAGTAGGCTTAGTGTTTGTGCGATC-3'                                      |
| $\Delta$ 70-114           | 5'-TCAACTTTGATCGCAGCAAATATTTTTGCATATAGCAGTGGCGATCAAGG-3'<br>5'-CCTTGATCGCCACTGCTATATGCAAAAATATTTGCTGCGATCAAAGTTGA-3'                       |
| $\Delta$ 93-114           | 5'-TCAAGAGGCTGTTCAAGATTTTTGCATATAGCAGTGGCGATCAAGG-3'<br>5'-CCTTGATCGCCACTGCTATATGCAAAAATCTGAACAGCCTCTTGA-3'                                |
| $\Delta\alpha$ 1(268-287) | 5'-GTTAACTAGTCCAAGCGCGGACGAAGCCATGCTCTTGAGTGCTGTTCAAGGCG -3'<br>5-CGCCTTGAACAGCACTCAAGAGCATGGCTTCGTCCGCGCTTGGACTAGTTAAC-3'                 |
| $\Delta$ AC(308-337)      | 5'-AGGCAGCTAGCACCTACGCTGGATCCACCCTGAAGAAGAATCAGGGTGAGGGTGACACGGTTTC-3'<br>5'-GAAACCGTGTACCCTGATTCTTCTCAGGGTGGATCCAGCGTAGCTGCTAGCTGCCTGG-3' |
| $\Delta\alpha$ 2(308-320) | 5'-CAGCTAGCACCTACGCTGGATCCGGTGAACAAACAACACTGAGACAGCCC-3'<br>5'-GGGCTGTCTCAGTTGTTTGTTCACCGGATCCAGCGTAGGTGCTAGCTG-3'                         |
| $\Delta\alpha$ 3(323-337) | 5'-GCTTTCAAATAACGGTGAAACCCTGAAGAAGAATCAGGGTGACACGG-3'<br>5'-CCGTGTCACCCTGATTCTTCTCAGGGTTTACCGTTATTTGAAAGC-3'                               |

- a. Bases in bold identify *Sph*I (**GCATGC**) and *Pst*I (**CTGCAG**) restriction sites.
- b. **TGC** in bold expresses the cysteine residue.
